# Supplementary material
Source: publisher figshare collection journal article supplement (https://frontiersin.figshare.com/ndownloader/files/25470107)
Supplement: Supplementary file 1 [file 25470107]

**Supplementary material 1.** Number of dolphin sightings, surveys and effort (km) between 2015 and 2018, for each year and for the whole period (2015-2018)

| Year | N° Surveys | km | Sightings |
| --- | --- | --- | --- |
| 2015 | 98 | 2.664 | 59 |
| 2016 | 88 | 2.608 | 64 |
| 2017 | 102 | 2.819 | 97 |
| 2018 | 103 | 2.767 | 87 |
| 2015-2018 | 391 | 10.858 | 307 |

**
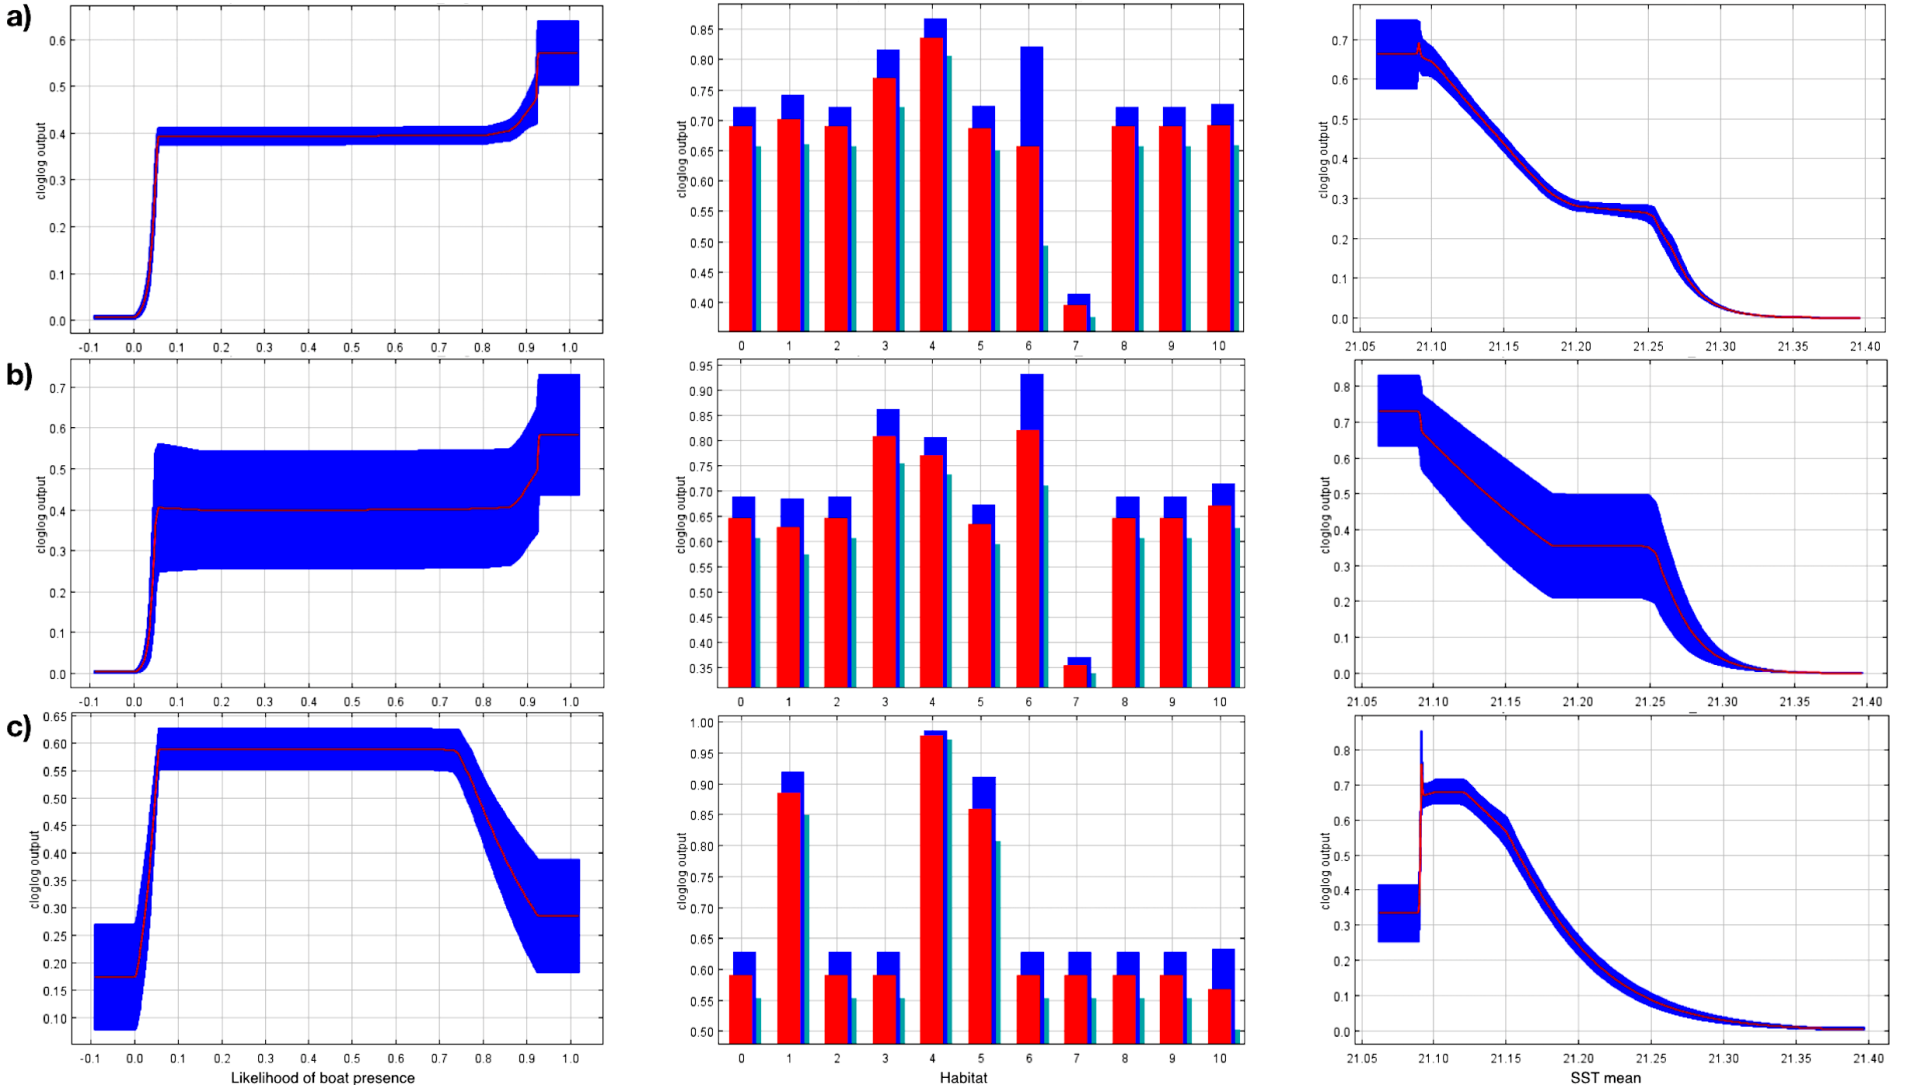
Supplementary material 2.** Likelihood of boat presence, SST mean and Habitat effect on likelihood of dolphin presence (cloglog output) for a) all groups; b) groups without calves; c) groups with calves.
